# Supplementary material
Source: publisher figshare collection journal article supplement (https://acs.figshare.com/ndownloader/files/5109502)
Supplement: Supplementary file 1 [file 5109502]

 
data_gk214b 
 
_audit_creation_method            SHELXL-97 
_chemical_name_systematic 
; 
 ? 
; 
_chemical_name_common             ? 
_chemical_formula_moiety          ? 
_chemical_formula_sum 
 'C26 H21 Cl2 N5 O6 Ru' 
_chemical_formula_weight          671.45 
 
loop_ 
 _atom_type_symbol 
 _atom_type_description 
 _atom_type_scat_dispersion_real 
 _atom_type_scat_dispersion_imag 
 _atom_type_scat_source 
 'C'  'C'   0.0033   0.0016 
 'International Tables Vol C Tables 4.2.6.8 and 6.1.1.4' 
 'H'  'H'   0.0000   0.0000 
 'International Tables Vol C Tables 4.2.6.8 and 6.1.1.4' 
 'O'  'O'   0.0106   0.0060 
 'International Tables Vol C Tables 4.2.6.8 and 6.1.1.4' 
 'N'  'N'   0.0061   0.0033 
 'International Tables Vol C Tables 4.2.6.8 and 6.1.1.4' 
 'Cl'  'Cl'   0.1484   0.1585 
 'International Tables Vol C Tables 4.2.6.8 and 6.1.1.4' 
 'Ru'  'Ru'  -1.2594   0.8363 
 'International Tables Vol C Tables 4.2.6.8 and 6.1.1.4' 
 
_symmetry_cell_setting           'Monoclinic' 
_symmetry_space_group_name_H-M   'C 2/c'
 
loop_ 
 _symmetry_equiv_pos_as_xyz 
 'x, y, z' 
 '-x, y, -z+1/2' 
 'x+1/2, y+1/2, z' 
 '-x+1/2, y+1/2, -z+1/2' 
 '-x, -y, -z' 
 'x, -y, z-1/2' 
 '-x+1/2, -y+1/2, -z' 
 'x+1/2, -y+1/2, z-1/2' 
 
_cell_length_a                    30.698(4) 
_cell_length_b                    7.9640(11) 
_cell_length_c                    22.463(3) 
_cell_angle_alpha                 90.00 
_cell_angle_beta                  106.066(10) 
_cell_angle_gamma                 90.00 
_cell_volume                      5277.2(11) 
_cell_formula_units_Z             8 
_cell_measurement_temperature     293(2) 
_cell_measurement_reflns_used     25
_cell_measurement_theta_min       5.7600
_cell_measurement_theta_max       13.0800
 
_exptl_crystal_description       'Block' 
_exptl_crystal_colour            'Black'
_exptl_crystal_size_max           0.35 
_exptl_crystal_size_mid           0.30 
_exptl_crystal_size_min           0.28 
_exptl_crystal_density_meas       ? 
_exptl_crystal_density_diffrn     1.690 
_exptl_crystal_density_method     'not measured' 
_exptl_crystal_F_000              2704 
_exptl_absorpt_coefficient_mu     0.849 
_exptl_absorpt_correction_type   'Psi-scan' 
_exptl_absorpt_correction_T_min   0.7554 
_exptl_absorpt_correction_T_max   0.8000 
 
_exptl_special_details 
; 
 ? 
; 
 
_diffrn_ambient_temperature       293(2) 
_diffrn_radiation_wavelength      0.71073 
_diffrn_radiation_type            MoK\a 
_diffrn_radiation_source          'fine-focus sealed tube' 
_diffrn_radiation_monochromator   graphite 
_diffrn_measurement_device_type  'Nonius MACH3' 
_diffrn_measurement_method        \w/q-scan 
_diffrn_detector_area_resol_mean  ? 
_diffrn_standards_number          3 
_diffrn_standards_interval_count  ? 
_diffrn_standards_interval_time   3600
_diffrn_standards_decay_%         '<3%' 
_diffrn_reflns_number             5333 
_diffrn_reflns_av_R_equivalents   0.0211 
_diffrn_reflns_av_sigmaI/netI     0.0445 
_diffrn_reflns_limit_h_min        -36 
_diffrn_reflns_limit_h_max        4 
_diffrn_reflns_limit_k_min        -9 
_diffrn_reflns_limit_k_max        0 
_diffrn_reflns_limit_l_min        -26 
_diffrn_reflns_limit_l_max        26 
_diffrn_reflns_theta_min          1.38 
_diffrn_reflns_theta_max          24.95 
_reflns_number_total              4647 
_reflns_number_gt                 3514 
_reflns_threshold_expression      >2sigma(I) 
 
_computing_data_collection       'Argus (Nonius, MACH3 software)'
_computing_cell_refinement       'Argus (Nonius, MACH3 software)' 
_computing_data_reduction        'Maxus (Nonius software)' 
_computing_structure_solution     'SHELXS-97 (Sheldrick, 1990)' 
_computing_structure_refinement   'SHELXL-97 (Sheldrick, 1997)' 
_computing_molecular_graphics     Ortep 
_computing_publication_material   Shelx97 
 
_refine_special_details 
; 
 Refinement of F^2^ against ALL reflections.  The weighted R-factor wR and 
 goodness of fit S are based on F^2^, conventional R-factors R are based 
 on F, with F set to zero for negative F^2^. The threshold expression of 
 F^2^ > 2sigma(F^2^) is used only for calculating R-factors(gt) etc. and is 
 not relevant to the choice of reflections for refinement.  R-factors based 
 on F^2^ are statistically about twice as large as those based on F, and R- 
 factors based on ALL data will be even larger. 
; 
 
_refine_ls_structure_factor_coef  Fsqd  
_refine_ls_matrix_type            full 
_refine_ls_weighting_scheme 
 'calc w=1/[\s^2^(Fo^2^)+(0.0468P)^2^+6.4121P] where P=(Fo^2^+2Fc^2^)/3' 
_atom_sites_solution_primary      direct 
_atom_sites_solution_secondary    difmap 
_atom_sites_solution_hydrogens    geom 
_refine_ls_hydrogen_treatment     mixed 
_refine_ls_extinction_method      none 
_refine_ls_extinction_coef        ? 
_refine_ls_number_reflns          4647 
_refine_ls_number_parameters      445 
_refine_ls_number_restraints      0 
_refine_ls_R_factor_all           0.0662 
_refine_ls_R_factor_gt            0.0346 
_refine_ls_wR_factor_ref          0.0939 
_refine_ls_wR_factor_gt           0.0832 
_refine_ls_goodness_of_fit_ref    1.051 
_refine_ls_restrained_S_all       1.051 
_refine_ls_shift/su_max           10.503 
_refine_ls_shift/su_mean          0.044 
 
loop_ 
 _atom_site_label 
 _atom_site_type_symbol 
 _atom_site_fract_x 
 _atom_site_fract_y 
 _atom_site_fract_z 
 _atom_site_U_iso_or_equiv 
 _atom_site_adp_type 
 _atom_site_occupancy 
 _atom_site_calc_flag 
 _atom_site_refinement_flags 
 _atom_site_disorder_assembly 
 _atom_site_disorder_group 
Ru Ru 0.109397(10) 0.22960(3) 0.129046(13) 0.03419(11) Uani 1 d . . . 
Cl1 Cl 0.05922(4) 0.07061(13) 0.04811(5) 0.0540(3) Uani 1 d . . . 
N1 N 0.15134(10) 0.3658(4) 0.19991(14) 0.0358(7) Uani 1 d . . . 
N2 N 0.09310(11) 0.0815(4) 0.19638(15) 0.0409(8) Uani 1 d . . . 
N3 N 0.16280(11) 0.0974(4) 0.11168(14) 0.0412(8) Uani 1 d . . . 
N4 N 0.12283(11) 0.3711(4) 0.06499(14) 0.0375(7) Uani 1 d . . . 
N5 N 0.05753(11) 0.4057(4) 0.11677(14) 0.0392(7) Uani 1 d . . . 
C1 C 0.19065(15) 0.4305(5) 0.1950(2) 0.0453(10) Uani 1 d . . . 
C2 C 0.21705(18) 0.5378(6) 0.2375(2) 0.0545(12) Uani 1 d . . . 
C3 C 0.20301(18) 0.5883(6) 0.2873(2) 0.0575(12) Uani 1 d . . . 
C4 C 0.16328(17) 0.5222(6) 0.2944(2) 0.0521(11) Uani 1 d . . . 
C5 C 0.13863(14) 0.4080(5) 0.25092(18) 0.0421(9) Uani 1 d . . . 
C6 C 0.09814(15) 0.3298(6) 0.26379(19) 0.0473(10) Uani 1 d . . . 
C7 C 0.08661(13) 0.1490(5) 0.24855(19) 0.0422(9) Uani 1 d . . . 
C8 C 0.07023(17) 0.0576(7) 0.2902(2) 0.0589(12) Uani 1 d . . . 
C9 C 0.06198(18) -0.1122(7) 0.2794(3) 0.0692(16) Uani 1 d . . . 
C10 C 0.06923(19) -0.1815(7) 0.2281(3) 0.0646(15) Uani 1 d . . . 
C11 C 0.08395(16) -0.0853(5) 0.1873(2) 0.0518(11) Uani 1 d . . . 
C12 C 0.18136(16) -0.0493(6) 0.1366(2) 0.0521(11) Uani 1 d . . . 
C13 C 0.21155(18) -0.1367(7) 0.1133(3) 0.0635(14) Uani 1 d . . . 
C14 C 0.22481(18) -0.0732(7) 0.0649(3) 0.0660(14) Uani 1 d . . . 
C15 C 0.20747(16) 0.0782(7) 0.0400(2) 0.0577(12) Uani 1 d . . . 
C16 C 0.17611(14) 0.1614(5) 0.06329(18) 0.0433(9) Uani 1 d . . . 
C17 C 0.15514(14) 0.3227(5) 0.03861(18) 0.0428(10) Uani 1 d . . . 
C18 C 0.16490(16) 0.4208(6) -0.0071(2) 0.0545(12) Uani 1 d . . . 
C19 C 0.14126(18) 0.5691(7) -0.0234(2) 0.0623(14) Uani 1 d . . . 
C20 C 0.10773(18) 0.6143(6) 0.0028(2) 0.0547(12) Uani 1 d . . . 
C21 C 0.09770(14) 0.5124(5) 0.04715(18) 0.0414(9) Uani 1 d . . . 
C22 C 0.06013(13) 0.5287(5) 0.07483(17) 0.0383(9) Uani 1 d . . . 
C23 C 0.02644(16) 0.6487(5) 0.0572(2) 0.0472(11) Uani 1 d . . . 
C24 C -0.01037(18) 0.6461(6) 0.0806(2) 0.0552(12) Uani 1 d . . . 
C25 C -0.01346(16) 0.5202(6) 0.1207(2) 0.0512(11) Uani 1 d . . . 
C26 C 0.02067(14) 0.4039(5) 0.1374(2) 0.0447(10) Uani 1 d . . . 
Cl2 Cl 0.19403(4) 0.00555(14) 0.36953(5) 0.0524(3) Uani 1 d . . . 
O1 O 0.07727(12) 0.4079(4) 0.29324(17) 0.0730(10) Uani 1 d . . . 
O2 O 0.18755(14) 0.0163(6) 0.30456(16) 0.0916(13) Uani 1 d . . . 
O3 O 0.18014(17) 0.1550(5) 0.3910(2) 0.1107(16) Uani 1 d . . . 
O4 O 0.24005(12) -0.0250(6) 0.39899(19) 0.0971(13) Uani 1 d . . . 
O5 O 0.16798(14) -0.1289(5) 0.38281(18) 0.0908(12) Uani 1 d . . . 
O111 O 0.0614(12) 0.032(3) 0.4204(8) 0.71(3) Uani 1 d . . . 
H11A H 0.0316(9) 0.072(4) 0.4105(14) 0.000(6) Uiso 1 d . . . 
H111 H 0.0895(9) -0.002(4) 0.4290(14) 0.000(6) Uiso 1 d . . . 
H26 H 0.0194(12) 0.318(5) 0.1663(16) 0.031(9) Uiso 1 d . . . 
H4 H 0.1540(15) 0.541(6) 0.328(2) 0.057(13) Uiso 1 d . . . 
H25 H -0.0371(17) 0.516(6) 0.140(2) 0.072(16) Uiso 1 d . . . 
H15 H 0.2141(14) 0.128(5) 0.0065(19) 0.049(13) Uiso 1 d . . . 
H14 H 0.2457(15) -0.130(6) 0.052(2) 0.057(13) Uiso 1 d . . . 
H19 H 0.1498(16) 0.637(7) -0.049(2) 0.073(16) Uiso 1 d . . . 
H24 H -0.0338(17) 0.713(6) 0.069(2) 0.073(16) Uiso 1 d . . . 
H2 H 0.2412(13) 0.569(5) 0.2314(17) 0.037(12) Uiso 1 d . . . 
H11 H 0.0874(13) -0.134(5) 0.1505(18) 0.038(11) Uiso 1 d . . . 
H10 H 0.0645(16) -0.276(6) 0.221(2) 0.059(16) Uiso 1 d . . . 
H23 H 0.0287(13) 0.722(5) 0.0297(17) 0.034(10) Uiso 1 d . . . 
H8 H 0.0656(14) 0.117(5) 0.324(2) 0.053(13) Uiso 1 d . . . 
H18 H 0.1867(17) 0.384(7) -0.028(2) 0.079(17) Uiso 1 d . . . 
H13 H 0.2220(16) -0.230(6) 0.134(2) 0.063(14) Uiso 1 d . . . 
H9 H 0.0547(16) -0.176(7) 0.310(2) 0.072(15) Uiso 1 d . . . 
H12 H 0.1721(14) -0.087(5) 0.171(2) 0.054(13) Uiso 1 d . . . 
H20 H 0.0931(15) 0.699(6) -0.007(2) 0.050(14) Uiso 1 d . . . 
H1 H 0.1989(14) 0.404(5) 0.162(2) 0.049(13) Uiso 1 d . . . 
H3 H 0.2189(14) 0.657(6) 0.317(2) 0.054(13) Uiso 1 d . . . 
 
loop_ 
 _atom_site_aniso_label 
 _atom_site_aniso_U_11 
 _atom_site_aniso_U_22 
 _atom_site_aniso_U_33 
 _atom_site_aniso_U_23 
 _atom_site_aniso_U_13 
 _atom_site_aniso_U_12 
Ru 0.04069(18) 0.02645(16) 0.03364(17) 0.00361(13) 0.00731(12) -0.00124(14) 
Cl1 0.0647(7) 0.0401(6) 0.0466(6) 0.0011(5) -0.0020(5) -0.0111(5) 
N1 0.0419(19) 0.0302(16) 0.0345(17) 0.0047(13) 0.0091(14) 0.0017(14) 
N2 0.0413(19) 0.0333(17) 0.0450(19) 0.0082(15) 0.0065(15) -0.0013(15) 
N3 0.047(2) 0.0362(18) 0.0382(18) -0.0010(15) 0.0072(15) 0.0012(15) 
N4 0.0419(18) 0.0332(17) 0.0347(17) 0.0014(14) 0.0061(14) -0.0067(15) 
N5 0.0462(19) 0.0294(16) 0.0385(17) 0.0029(14) 0.0061(15) -0.0017(14) 
C1 0.048(3) 0.045(2) 0.043(2) 0.001(2) 0.013(2) -0.005(2) 
C2 0.051(3) 0.051(3) 0.058(3) 0.001(2) 0.011(2) -0.012(2) 
C3 0.065(3) 0.048(3) 0.053(3) -0.011(2) 0.005(2) -0.012(2) 
C4 0.070(3) 0.045(3) 0.042(2) -0.009(2) 0.016(2) 0.002(2) 
C5 0.051(2) 0.034(2) 0.040(2) 0.0056(17) 0.0110(19) 0.0050(18) 
C6 0.054(3) 0.049(2) 0.042(2) 0.0039(19) 0.018(2) 0.003(2) 
C7 0.042(2) 0.042(2) 0.044(2) 0.0096(19) 0.0149(19) 0.0020(19) 
C8 0.063(3) 0.064(3) 0.053(3) 0.012(3) 0.021(2) -0.005(3) 
C9 0.069(3) 0.074(4) 0.063(3) 0.028(3) 0.016(3) -0.018(3) 
C10 0.071(4) 0.041(3) 0.070(4) 0.020(3) 0.001(3) -0.015(3) 
C11 0.059(3) 0.039(2) 0.051(3) 0.008(2) 0.006(2) -0.006(2) 
C12 0.061(3) 0.042(2) 0.050(3) 0.005(2) 0.012(2) 0.009(2) 
C13 0.069(3) 0.045(3) 0.075(4) -0.001(3) 0.017(3) 0.017(3) 
C14 0.062(3) 0.071(4) 0.067(3) -0.013(3) 0.021(3) 0.016(3) 
C15 0.053(3) 0.070(3) 0.051(3) -0.006(3) 0.016(2) -0.001(3) 
C16 0.044(2) 0.047(2) 0.039(2) -0.0058(19) 0.0104(19) -0.0015(19) 
C17 0.042(2) 0.048(2) 0.037(2) 0.0002(18) 0.0077(18) -0.0058(19) 
C18 0.052(3) 0.067(3) 0.045(2) 0.011(2) 0.015(2) -0.005(2) 
C19 0.067(3) 0.065(3) 0.055(3) 0.021(3) 0.017(3) -0.016(3) 
C20 0.064(3) 0.041(3) 0.057(3) 0.016(2) 0.013(2) -0.004(2) 
C21 0.048(2) 0.031(2) 0.040(2) 0.0032(17) 0.0030(18) -0.0074(18) 
C22 0.044(2) 0.0281(19) 0.038(2) 0.0019(16) 0.0016(18) -0.0054(17) 
C23 0.062(3) 0.027(2) 0.047(2) 0.0053(19) 0.005(2) 0.000(2) 
C24 0.055(3) 0.044(3) 0.062(3) 0.002(2) 0.008(2) 0.010(2) 
C25 0.049(3) 0.052(3) 0.053(3) 0.001(2) 0.016(2) 0.004(2) 
C26 0.047(2) 0.037(2) 0.048(2) 0.0065(19) 0.011(2) 0.0000(19) 
Cl2 0.0536(7) 0.0495(6) 0.0557(6) -0.0024(5) 0.0176(5) -0.0002(5) 
O1 0.085(3) 0.067(2) 0.086(2) -0.0106(19) 0.054(2) 0.0010(19) 
O2 0.098(3) 0.122(3) 0.059(2) 0.015(2) 0.029(2) 0.014(3) 
O3 0.139(4) 0.072(3) 0.132(4) -0.031(3) 0.055(3) 0.019(3) 
O4 0.056(2) 0.127(4) 0.099(3) 0.026(3) 0.006(2) 0.012(2) 
O5 0.103(3) 0.083(3) 0.086(3) 0.004(2) 0.024(2) -0.040(2) 
O111 1.53(9) 0.40(3) 0.274(19) -0.055(16) 0.35(4) -0.37(4) 
 
_geom_special_details 
; 
 All esds (except the esd in the dihedral angle between two l.s. planes) 
 are estimated using the full covariance matrix.  The cell esds are taken 
 into account individually in the estimation of esds in distances, angles 
 and torsion angles; correlations between esds in cell parameters are only 
 used when they are defined by crystal symmetry.  An approximate (isotropic) 
 treatment of cell esds is used for estimating esds involving l.s. planes. 
; 
 
loop_ 
 _geom_bond_atom_site_label_1 
 _geom_bond_atom_site_label_2 
 _geom_bond_distance 
 _geom_bond_site_symmetry_2 
 _geom_bond_publ_flag 
Ru N4 1.959(3) . ? 
Ru N1 2.058(3) . ? 
Ru N3 2.074(3) . ? 
Ru N5 2.082(3) . ? 
Ru N2 2.085(3) . ? 
Ru Cl1 2.3940(11) . ? 
N1 C1 1.345(5) . ? 
N1 C5 1.351(5) . ? 
N2 C7 1.353(5) . ? 
N2 C11 1.361(5) . ? 
N3 C12 1.352(5) . ? 
N3 C16 1.362(5) . ? 
N4 C17 1.345(5) . ? 
N4 C21 1.361(5) . ? 
N5 C26 1.337(5) . ? 
N5 C22 1.377(5) . ? 
C1 C2 1.368(6) . ? 
C1 H1 0.88(4) . ? 
C2 C3 1.365(7) . ? 
C2 H2 0.83(4) . ? 
C3 C4 1.378(7) . ? 
C3 H3 0.89(5) . ? 
C4 C5 1.394(6) . ? 
C4 H4 0.89(4) . ? 
C5 C6 1.489(6) . ? 
C6 O1 1.212(5) . ? 
C6 C7 1.500(6) . ? 
C7 C8 1.385(6) . ? 
C8 C9 1.385(7) . ? 
C8 H8 0.94(4) . ? 
C9 C10 1.350(8) . ? 
C9 H9 0.92(5) . ? 
C10 C11 1.364(7) . ? 
C10 H10 0.78(5) . ? 
C11 H11 0.94(4) . ? 
C12 C13 1.373(7) . ? 
C12 H12 0.95(4) . ? 
C13 C14 1.360(7) . ? 
C13 H13 0.89(5) . ? 
C14 C15 1.373(7) . ? 
C14 H14 0.89(4) . ? 
C15 C16 1.386(6) . ? 
C15 H15 0.92(4) . ? 
C16 C17 1.474(6) . ? 
C17 C18 1.388(6) . ? 
C18 C19 1.381(7) . ? 
C18 H18 0.96(5) . ? 
C19 C20 1.368(7) . ? 
C19 H19 0.87(5) . ? 
C20 C21 1.383(6) . ? 
C20 H20 0.81(4) . ? 
C21 C22 1.460(6) . ? 
C22 C23 1.383(6) . ? 
C23 C24 1.371(7) . ? 
C23 H23 0.87(4) . ? 
C24 C25 1.369(7) . ? 
C24 H24 0.87(5) . ? 
C25 C26 1.371(6) . ? 
C25 H25 0.94(5) . ? 
C26 H26 0.95(4) . ? 
Cl2 O3 1.395(4) . ? 
Cl2 O4 1.405(4) . ? 
Cl2 O5 1.417(4) . ? 
Cl2 O2 1.420(4) . ? 
O111 H11A 0.94(5) . ? 
O111 H111 0.87(5) . ? 
 
loop_ 
 _geom_angle_atom_site_label_1 
 _geom_angle_atom_site_label_2 
 _geom_angle_atom_site_label_3 
 _geom_angle 
 _geom_angle_site_symmetry_1 
 _geom_angle_site_symmetry_3 
 _geom_angle_publ_flag 
N4 Ru N1 92.93(12) . . ? 
N4 Ru N3 79.38(13) . . ? 
N1 Ru N3 93.16(12) . . ? 
N4 Ru N5 79.87(13) . . ? 
N1 Ru N5 92.24(12) . . ? 
N3 Ru N5 158.79(13) . . ? 
N4 Ru N2 178.29(13) . . ? 
N1 Ru N2 87.79(12) . . ? 
N3 Ru N2 102.13(13) . . ? 
N5 Ru N2 98.56(13) . . ? 
N4 Ru Cl1 88.19(9) . . ? 
N1 Ru Cl1 178.53(9) . . ? 
N3 Ru Cl1 87.97(9) . . ? 
N5 Ru Cl1 87.02(9) . . ? 
N2 Ru Cl1 91.07(9) . . ? 
C1 N1 C5 116.8(3) . . ? 
C1 N1 Ru 121.5(3) . . ? 
C5 N1 Ru 121.4(3) . . ? 
C7 N2 C11 116.3(4) . . ? 
C7 N2 Ru 121.7(3) . . ? 
C11 N2 Ru 121.6(3) . . ? 
C12 N3 C16 118.0(4) . . ? 
C12 N3 Ru 128.7(3) . . ? 
C16 N3 Ru 112.8(3) . . ? 
C17 N4 C21 122.3(3) . . ? 
C17 N4 Ru 119.3(3) . . ? 
C21 N4 Ru 118.3(3) . . ? 
C26 N5 C22 117.4(3) . . ? 
C26 N5 Ru 129.5(3) . . ? 
C22 N5 Ru 112.5(3) . . ? 
N1 C1 C2 123.6(4) . . ? 
N1 C1 H1 117(3) . . ? 
C2 C1 H1 119(3) . . ? 
C3 C2 C1 119.7(5) . . ? 
C3 C2 H2 123(3) . . ? 
C1 C2 H2 117(3) . . ? 
C2 C3 C4 118.2(4) . . ? 
C2 C3 H3 124(3) . . ? 
C4 C3 H3 118(3) . . ? 
C3 C4 C5 119.6(4) . . ? 
C3 C4 H4 122(3) . . ? 
C5 C4 H4 118(3) . . ? 
N1 C5 C4 121.9(4) . . ? 
N1 C5 C6 120.9(4) . . ? 
C4 C5 C6 117.2(4) . . ? 
O1 C6 C5 119.1(4) . . ? 
O1 C6 C7 119.4(4) . . ? 
C5 C6 C7 121.0(4) . . ? 
N2 C7 C8 123.0(4) . . ? 
N2 C7 C6 119.8(3) . . ? 
C8 C7 C6 117.2(4) . . ? 
C7 C8 C9 118.5(5) . . ? 
C7 C8 H8 117(3) . . ? 
C9 C8 H8 125(3) . . ? 
C10 C9 C8 119.0(5) . . ? 
C10 C9 H9 122(3) . . ? 
C8 C9 H9 118(3) . . ? 
C9 C10 C11 120.5(5) . . ? 
C9 C10 H10 121(4) . . ? 
C11 C10 H10 119(4) . . ? 
N2 C11 C10 122.7(5) . . ? 
N2 C11 H11 118(2) . . ? 
C10 C11 H11 120(2) . . ? 
N3 C12 C13 122.2(5) . . ? 
N3 C12 H12 115(3) . . ? 
C13 C12 H12 123(3) . . ? 
C14 C13 C12 120.0(5) . . ? 
C14 C13 H13 125(3) . . ? 
C12 C13 H13 115(3) . . ? 
C13 C14 C15 119.0(5) . . ? 
C13 C14 H14 118(3) . . ? 
C15 C14 H14 123(3) . . ? 
C14 C15 C16 119.9(5) . . ? 
C14 C15 H15 124(3) . . ? 
C16 C15 H15 116(3) . . ? 
N3 C16 C15 121.1(4) . . ? 
N3 C16 C17 115.5(3) . . ? 
C15 C16 C17 123.5(4) . . ? 
N4 C17 C18 120.1(4) . . ? 
N4 C17 C16 112.5(3) . . ? 
C18 C17 C16 127.4(4) . . ? 
C19 C18 C17 118.2(5) . . ? 
C19 C18 H18 121(3) . . ? 
C17 C18 H18 121(3) . . ? 
C20 C19 C18 120.9(5) . . ? 
C20 C19 H19 121(3) . . ? 
C18 C19 H19 118(3) . . ? 
C19 C20 C21 120.0(5) . . ? 
C19 C20 H20 122(3) . . ? 
C21 C20 H20 118(3) . . ? 
N4 C21 C20 118.4(4) . . ? 
N4 C21 C22 113.5(3) . . ? 
C20 C21 C22 127.9(4) . . ? 
N5 C22 C23 120.4(4) . . ? 
N5 C22 C21 115.5(3) . . ? 
C23 C22 C21 123.8(4) . . ? 
C24 C23 C22 120.7(4) . . ? 
C24 C23 H23 121(3) . . ? 
C22 C23 H23 118(3) . . ? 
C25 C24 C23 118.5(5) . . ? 
C25 C24 H24 117(3) . . ? 
C23 C24 H24 125(3) . . ? 
C24 C25 C26 119.2(5) . . ? 
C24 C25 H25 122(3) . . ? 
C26 C25 H25 118(3) . . ? 
N5 C26 C25 123.7(4) . . ? 
N5 C26 H26 116(2) . . ? 
C25 C26 H26 120(2) . . ? 
O3 Cl2 O4 110.4(3) . . ? 
O3 Cl2 O5 109.1(3) . . ? 
O4 Cl2 O5 108.8(3) . . ? 
O3 Cl2 O2 109.5(3) . . ? 
O4 Cl2 O2 109.3(3) . . ? 
O5 Cl2 O2 109.6(3) . . ? 
H11A O111 H111 177(5) . . ? 
 
loop_ 
 _geom_torsion_atom_site_label_1 
 _geom_torsion_atom_site_label_2 
 _geom_torsion_atom_site_label_3 
 _geom_torsion_atom_site_label_4 
 _geom_torsion 
 _geom_torsion_site_symmetry_1 
 _geom_torsion_site_symmetry_2 
 _geom_torsion_site_symmetry_3 
 _geom_torsion_site_symmetry_4 
 _geom_torsion_publ_flag 
N4 Ru N1 C1 -36.6(3) . . . . ? 
N3 Ru N1 C1 42.9(3) . . . . ? 
N5 Ru N1 C1 -116.6(3) . . . . ? 
N2 Ru N1 C1 144.9(3) . . . . ? 
Cl1 Ru N1 C1 -176(3) . . . . ? 
N4 Ru N1 C5 136.9(3) . . . . ? 
N3 Ru N1 C5 -143.6(3) . . . . ? 
N5 Ru N1 C5 56.9(3) . . . . ? 
N2 Ru N1 C5 -41.6(3) . . . . ? 
Cl1 Ru N1 C5 -3(4) . . . . ? 
N4 Ru N2 C7 -75(4) . . . . ? 
N1 Ru N2 C7 40.3(3) . . . . ? 
N3 Ru N2 C7 133.0(3) . . . . ? 
N5 Ru N2 C7 -51.7(3) . . . . ? 
Cl1 Ru N2 C7 -138.8(3) . . . . ? 
N4 Ru N2 C11 99(4) . . . . ? 
N1 Ru N2 C11 -146.5(3) . . . . ? 
N3 Ru N2 C11 -53.7(3) . . . . ? 
N5 Ru N2 C11 121.6(3) . . . . ? 
Cl1 Ru N2 C11 34.4(3) . . . . ? 
N4 Ru N3 C12 -177.7(4) . . . . ? 
N1 Ru N3 C12 89.9(4) . . . . ? 
N5 Ru N3 C12 -165.5(3) . . . . ? 
N2 Ru N3 C12 1.5(4) . . . . ? 
Cl1 Ru N3 C12 -89.1(3) . . . . ? 
N4 Ru N3 C16 -6.2(3) . . . . ? 
N1 Ru N3 C16 -98.6(3) . . . . ? 
N5 Ru N3 C16 6.0(5) . . . . ? 
N2 Ru N3 C16 173.0(3) . . . . ? 
Cl1 Ru N3 C16 82.4(3) . . . . ? 
N1 Ru N4 C17 95.7(3) . . . . ? 
N3 Ru N4 C17 3.1(3) . . . . ? 
N5 Ru N4 C17 -172.5(3) . . . . ? 
N2 Ru N4 C17 -149(4) . . . . ? 
Cl1 Ru N4 C17 -85.2(3) . . . . ? 
N1 Ru N4 C21 -86.7(3) . . . . ? 
N3 Ru N4 C21 -179.4(3) . . . . ? 
N5 Ru N4 C21 5.0(3) . . . . ? 
N2 Ru N4 C21 28(4) . . . . ? 
Cl1 Ru N4 C21 92.3(3) . . . . ? 
N4 Ru N5 C26 168.4(4) . . . . ? 
N1 Ru N5 C26 -99.0(3) . . . . ? 
N3 Ru N5 C26 156.3(4) . . . . ? 
N2 Ru N5 C26 -10.9(4) . . . . ? 
Cl1 Ru N5 C26 79.7(3) . . . . ? 
N4 Ru N5 C22 -2.8(2) . . . . ? 
N1 Ru N5 C22 89.8(3) . . . . ? 
N3 Ru N5 C22 -14.9(5) . . . . ? 
N2 Ru N5 C22 177.9(2) . . . . ? 
Cl1 Ru N5 C22 -91.5(2) . . . . ? 
C5 N1 C1 C2 -1.7(6) . . . . ? 
Ru N1 C1 C2 172.1(3) . . . . ? 
N1 C1 C2 C3 -2.0(7) . . . . ? 
C1 C2 C3 C4 3.0(7) . . . . ? 
C2 C3 C4 C5 -0.5(7) . . . . ? 
C1 N1 C5 C4 4.3(6) . . . . ? 
Ru N1 C5 C4 -169.5(3) . . . . ? 
C1 N1 C5 C6 -173.8(4) . . . . ? 
Ru N1 C5 C6 12.3(5) . . . . ? 
C3 C4 C5 N1 -3.3(7) . . . . ? 
C3 C4 C5 C6 174.9(4) . . . . ? 
N1 C5 C6 O1 -151.8(4) . . . . ? 
C4 C5 C6 O1 29.9(6) . . . . ? 
N1 C5 C6 C7 36.5(6) . . . . ? 
C4 C5 C6 C7 -141.7(4) . . . . ? 
C11 N2 C7 C8 -2.0(6) . . . . ? 
Ru N2 C7 C8 171.6(3) . . . . ? 
C11 N2 C7 C6 176.9(4) . . . . ? 
Ru N2 C7 C6 -9.5(5) . . . . ? 
O1 C6 C7 N2 150.7(4) . . . . ? 
C5 C6 C7 N2 -37.7(6) . . . . ? 
O1 C6 C7 C8 -30.4(6) . . . . ? 
C5 C6 C7 C8 141.2(4) . . . . ? 
N2 C7 C8 C9 2.9(7) . . . . ? 
C6 C7 C8 C9 -176.0(4) . . . . ? 
C7 C8 C9 C10 -1.4(8) . . . . ? 
C8 C9 C10 C11 -0.8(8) . . . . ? 
C7 N2 C11 C10 -0.3(6) . . . . ? 
Ru N2 C11 C10 -173.9(4) . . . . ? 
C9 C10 C11 N2 1.7(8) . . . . ? 
C16 N3 C12 C13 -2.3(6) . . . . ? 
Ru N3 C12 C13 168.8(4) . . . . ? 
N3 C12 C13 C14 2.2(8) . . . . ? 
C12 C13 C14 C15 -0.2(8) . . . . ? 
C13 C14 C15 C16 -1.6(8) . . . . ? 
C12 N3 C16 C15 0.5(6) . . . . ? 
Ru N3 C16 C15 -172.0(3) . . . . ? 
C12 N3 C16 C17 -179.2(4) . . . . ? 
Ru N3 C16 C17 8.3(4) . . . . ? 
C14 C15 C16 N3 1.5(7) . . . . ? 
C14 C15 C16 C17 -178.8(4) . . . . ? 
C21 N4 C17 C18 2.1(6) . . . . ? 
Ru N4 C17 C18 179.6(3) . . . . ? 
C21 N4 C17 C16 -177.0(3) . . . . ? 
Ru N4 C17 C16 0.4(4) . . . . ? 
N3 C16 C17 N4 -5.9(5) . . . . ? 
C15 C16 C17 N4 174.4(4) . . . . ? 
N3 C16 C17 C18 175.0(4) . . . . ? 
C15 C16 C17 C18 -4.7(7) . . . . ? 
N4 C17 C18 C19 1.3(6) . . . . ? 
C16 C17 C18 C19 -179.7(4) . . . . ? 
C17 C18 C19 C20 -2.9(7) . . . . ? 
C18 C19 C20 C21 1.3(8) . . . . ? 
C17 N4 C21 C20 -3.8(6) . . . . ? 
Ru N4 C21 C20 178.7(3) . . . . ? 
C17 N4 C21 C22 171.3(3) . . . . ? 
Ru N4 C21 C22 -6.2(4) . . . . ? 
C19 C20 C21 N4 2.1(6) . . . . ? 
C19 C20 C21 C22 -172.2(4) . . . . ? 
C26 N5 C22 C23 2.5(5) . . . . ? 
Ru N5 C22 C23 174.9(3) . . . . ? 
C26 N5 C22 C21 -172.0(3) . . . . ? 
Ru N5 C22 C21 0.4(4) . . . . ? 
N4 C21 C22 N5 3.5(5) . . . . ? 
C20 C21 C22 N5 178.1(4) . . . . ? 
N4 C21 C22 C23 -170.7(4) . . . . ? 
C20 C21 C22 C23 3.8(6) . . . . ? 
N5 C22 C23 C24 -0.8(6) . . . . ? 
C21 C22 C23 C24 173.2(4) . . . . ? 
C22 C23 C24 C25 -1.3(7) . . . . ? 
C23 C24 C25 C26 1.6(7) . . . . ? 
C22 N5 C26 C25 -2.2(6) . . . . ? 
Ru N5 C26 C25 -173.1(3) . . . . ? 
C24 C25 C26 N5 0.1(7) . . . . ? 
 
loop_ 
 _geom_hbond_atom_site_label_D 
 _geom_hbond_atom_site_label_H 
 _geom_hbond_atom_site_label_A 
 _geom_hbond_distance_DH 
 _geom_hbond_distance_HA 
 _geom_hbond_distance_DA 
 _geom_hbond_angle_DHA 
 _geom_hbond_site_symmetry_A 
C25 H25 O1  0.94(5) 2.35(5) 3.235(6) 156(4) 2 
C2 H2 O2  0.83(4) 2.57(4) 3.322(7) 152(4) 4 
C19 H19 O3  0.87(5) 2.48(5) 3.350(6) 173(4) 6_565 
C1 H1 O4  0.88(4) 2.67(4) 3.405(6) 143(4) 4 
 
_diffrn_measured_fraction_theta_max    0.462 
_diffrn_reflns_theta_full              24.95 
_diffrn_measured_fraction_theta_full   0.462 
_refine_diff_density_max    0.720 
_refine_diff_density_min   -0.364 
_refine_diff_density_rms    0.078 
